# Supplementary material
Source: PubMed Central journal article supplement (PMC3707678)

## SI Figure Legends

**Fig. S1. PDH-E1 $\alpha$  Ser293 phosphorylation in P1 Liver.** (A) Immunoblot for phosphorylated Ser293 of Pyruvate Dehydrogenase (PDH) E1 $\alpha$  subunit (PDH-p293) and total PDH-E1 $\alpha$  (PDHt) in protein lysates derived from livers of P0 mice. (B) Densitometric quantification of phosphorylated Ser293 of PDH-E1 $\alpha$  (pSer293-PDHE1 $\alpha$ ) normalized to total PDHE1 $\alpha$ . n = 7/group.

**Fig. S2. Normal oxidative and ketogenic machinery in livers of P1 SCOT-KO mice.** (A) Relative mRNA abundances of *Fabp1*, *Fgf21*, *Cpt1a*, *Acadm*, *Hmgcs2*, and *Bdh1* in livers of P1 mice. n = 5/group. (B) Immunoblots for HMGCS2 and actin in protein lysates derived from livers of P1 mice. Densitometric quantification normalized to actin below. n = 4/group. (C) Immunoblots for BDH1 and actin in protein lysates derived from livers of P1 mice. Densitometric quantification normalized to actin below. n = 7/group. \*, p < 0.05 by Student's *t* test.

**Fig. S3. Normal hepatic fractional enrichment of <sup>13</sup>C-glutamate from [<sup>13</sup>C]octanoate in P0 SCOT-KO mice.** (A) Fractional <sup>13</sup>C-enrichments of glutamate (left) and total hepatic glutamate pools (right) 20 min after intraperitoneal injection of sodium [1,2,3,4-<sup>13</sup>C<sub>4</sub>]octanoate (10  $\mu$ mol per g body weight) in livers unfed (n=6-7/group) and (B) milk-fed P0 mice (n=6/group).

**Fig. S4. Normal oxidative and ketogenic machinery in livers of milk-fed P0 SCOT-KO mice.** (A) Relative mRNA abundance of *Fabp1*, *Cpt1a*, *Acadm*, *Hmgcs2*, and *Bdh1* in livers of fed P0 mice. n = 5/group. (B) Immunoblots for HMGCS2 and actin in protein lysates derived from livers of P0 mice. Densitometric quantification normalized to actin on right. n = 4/group. \*, p < 0.05 by Student's *t* test.

**Fig. S5. Relative abundances of mRNAs encoding mediators of NAD<sup>+</sup> metabolism and signaling in livers of P0 and P1 mice.** n = 5/group. *Nampt*, nicotinamide adenine dinucleotide phosphoribosyl transferase. *Sirt1*, silent mating type information regulation 2 homolog 1.

**Fig. S6. CoA transferase protein abundance in neonatal tissues.** CoA transferase (SCOT) and actin immunoblots of protein lysates derived from brain, heart, skeletal muscle, and liver collected from P0 wild type and SCOT-KO mice.

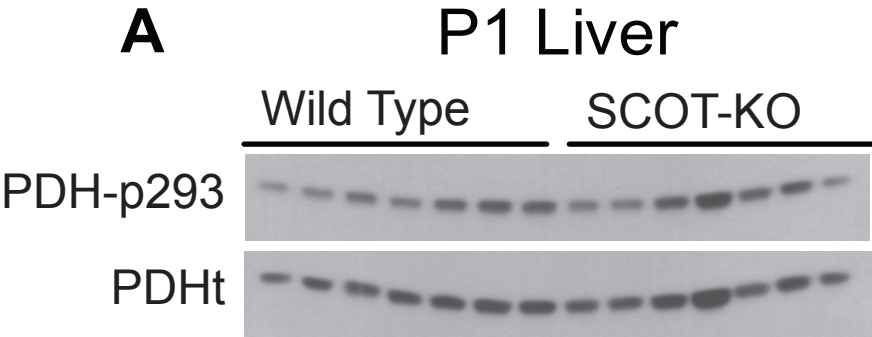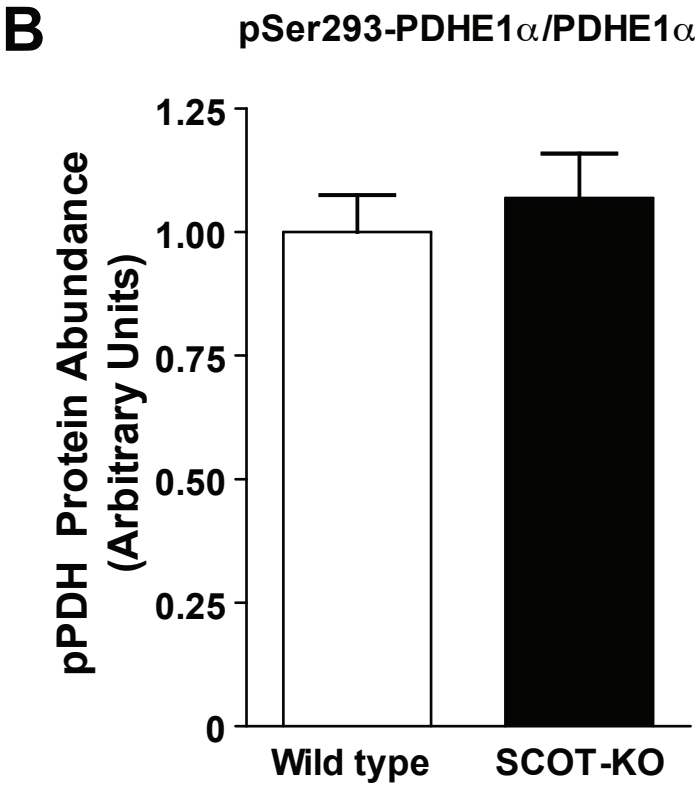

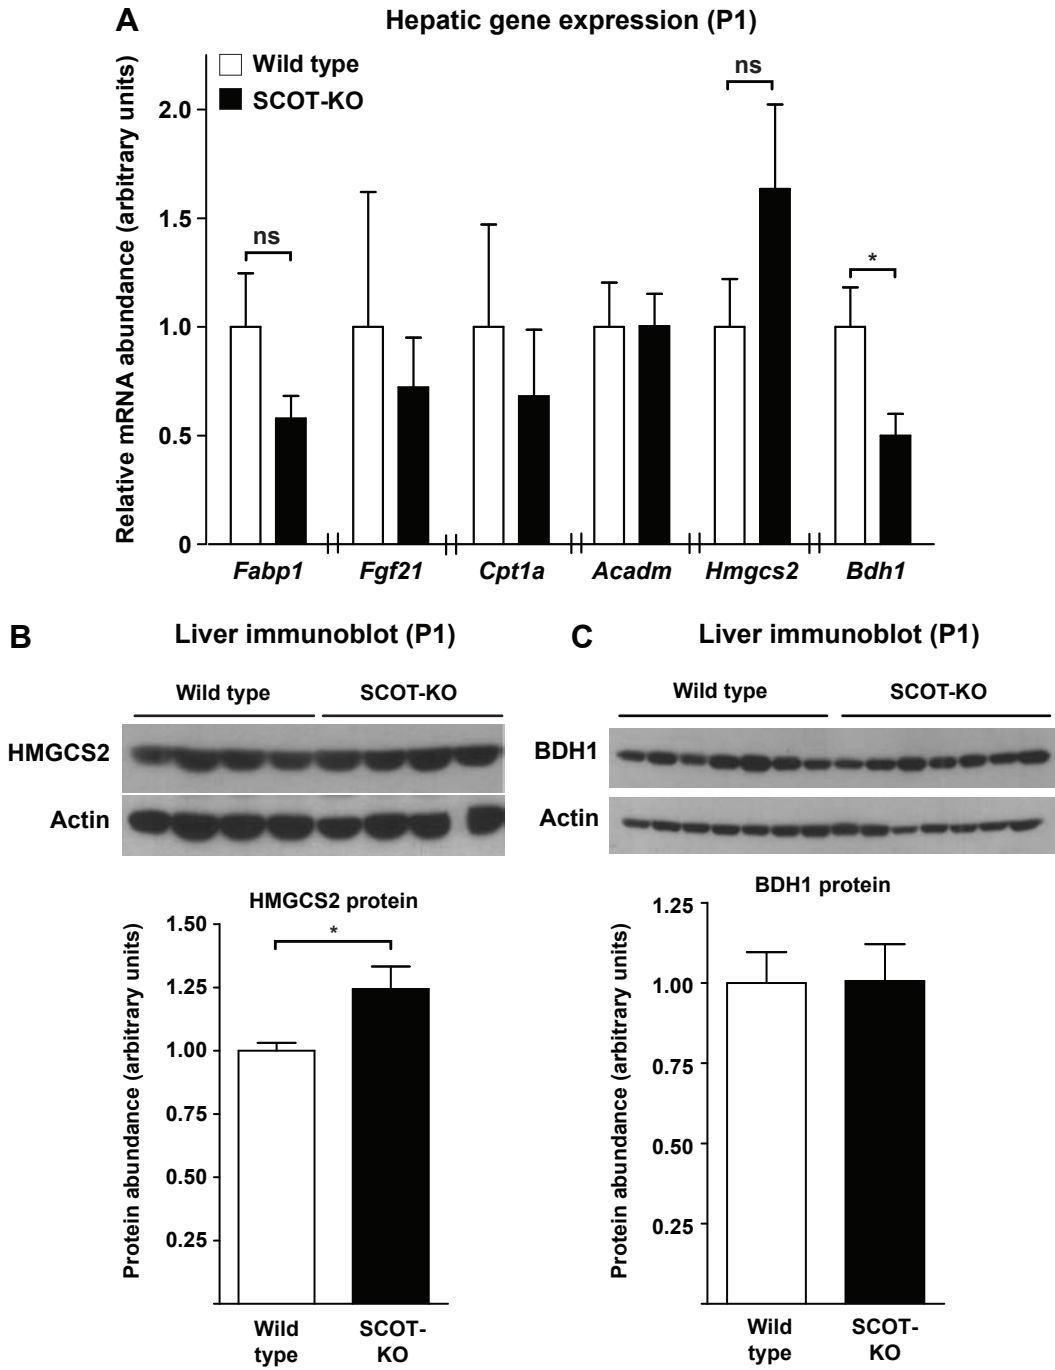

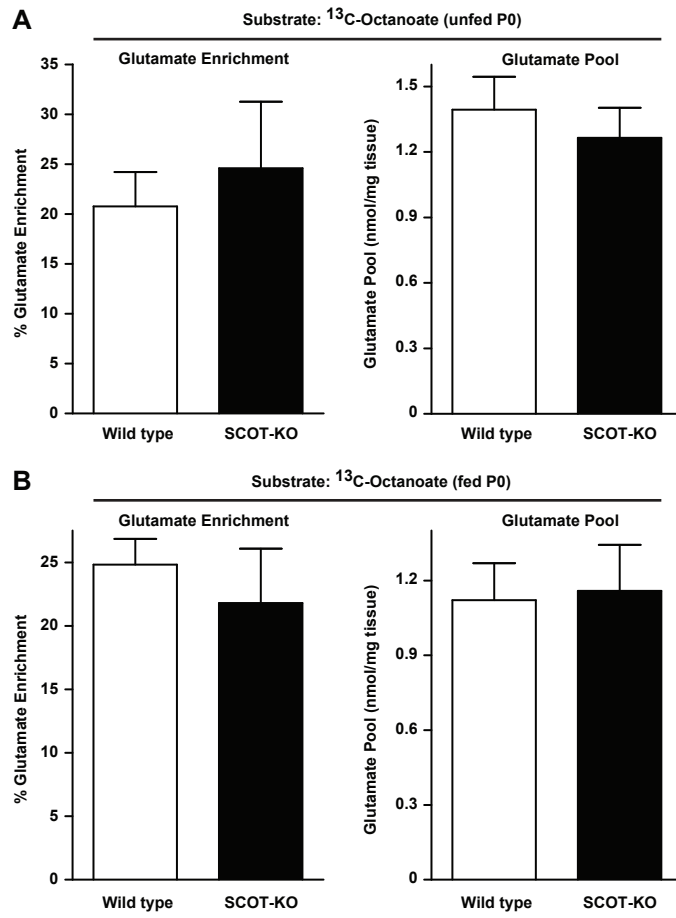

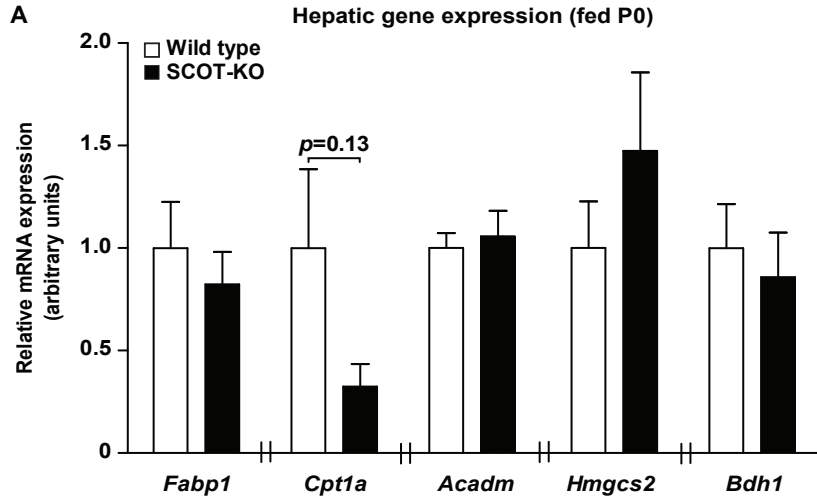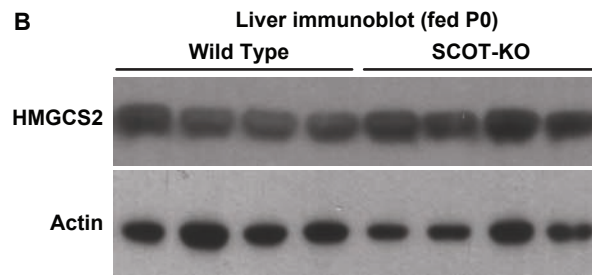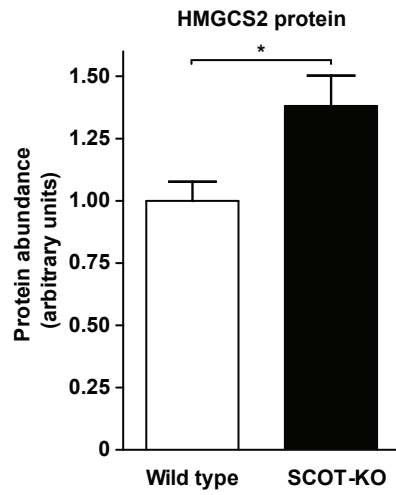

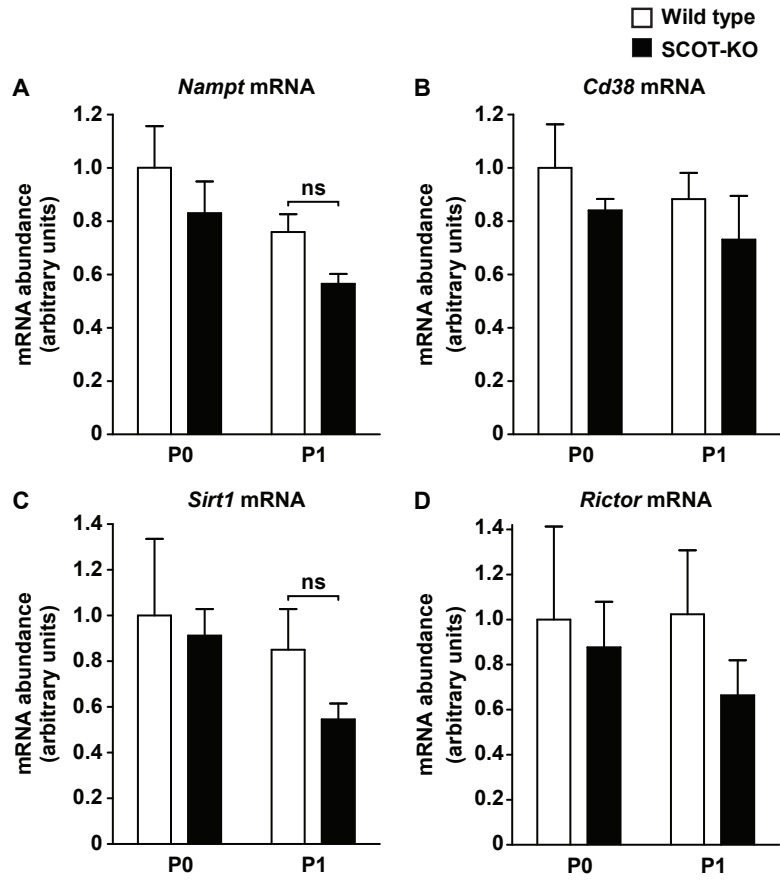

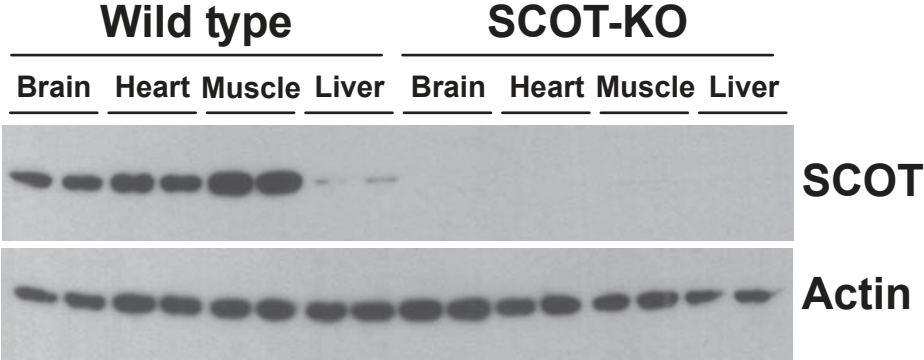

Supplement: supp_M113.454868_jbc.M113.454868-1.pdf [file supp_M113.454868_jbc.M113.454868-1.pdf]
